# Supplementary material for: Low-FODMAP Diet Improves Irritable Bowel Syndrome Symptoms: A Meta-Analysis
Source: MDPI journal article supplement (doi:10.3390/nu9090940), 2017-08-26
Supplement: s1 [file s1]

**Supplementary Table S2. Cochrane Collaboration tool for assessing risk of bias**

| Study                                  | Random sequence generation (selection bias) | Allocation concealment (selection bias) | Blinding of participants and personnel (performance bias) | Blinding of outcome assessment (detection bias) (patient-reported outcomes) | Incomplete outcome data addressed (attrition bias) (Short-term outcomes (2-6 weeks)) | Incomplete outcome data addressed (attrition bias) (Longer-term outcomes (>6 weeks)) | Selective reporting (reporting bias) |
|----------------------------------------|---------------------------------------------|-----------------------------------------|-----------------------------------------------------------|-----------------------------------------------------------------------------|--------------------------------------------------------------------------------------|--------------------------------------------------------------------------------------|--------------------------------------|
| Low FODMAP versus Traditional IBS diet |                                             |                                         |                                                           |                                                                             |                                                                                      |                                                                                      |                                      |
| Eswaran 2016 <sup>30</sup>             | Low                                         | Low                                     | High                                                      | High                                                                        | Low                                                                                  | Not Applicable                                                                       | Low                                  |
| Bohn 2015 <sup>29</sup>                | Low                                         | Low                                     | High                                                      | Low                                                                         | Low                                                                                  | Not Applicable                                                                       | Low                                  |
| Staudacher 2012 <sup>36</sup>          | Low                                         | High                                    | Unclear                                                   | Unclear                                                                     | Low                                                                                  | Not Applicable                                                                       | Low                                  |
| Low FODMAP versus High FODMAP diet     |                                             |                                         |                                                           |                                                                             |                                                                                      |                                                                                      |                                      |
| McIntosh 2016 <sup>53</sup>            | Low                                         | Low                                     | High                                                      | Low                                                                         | Low                                                                                  | Not Applicable                                                                       | Low                                  |
| Halmos 2014 <sup>26</sup>              | Low                                         | Low                                     | High                                                      | Low                                                                         | Low                                                                                  | Not Applicable                                                                       | Low                                  |
| Ong 2010 <sup>25</sup>                 | Low                                         | Low                                     | Low                                                       | Low                                                                         | Low                                                                                  | Not Applicable                                                                       | Low                                  |
