# Supplementary material for: Low-FODMAP Diet Improves Irritable Bowel Syndrome Symptoms: A Meta-Analysis
Source: MDPI journal article supplement (doi:10.3390/nu9090940), 2017-08-26
Supplement: s1 [file s1]

**Supplementary Table S3.** New Castle-Ottawa scale assessment for cohort studies

| Study ID                         | Selection                            |                                     |                           |                                                                                  | Comparability                                                      | Outcome               |                                                 |                               |
|----------------------------------|--------------------------------------|-------------------------------------|---------------------------|----------------------------------------------------------------------------------|--------------------------------------------------------------------|-----------------------|-------------------------------------------------|-------------------------------|
|                                  | Representativeness of exposed cohort | Selection of the non-exposed cohort | Ascertainment of exposure | Demonstration that outcome of interest was not present at the start of the study | Comparability of the cohort on the basis of the design of analysis | Assessment of outcome | Was follow-up long enough for outcomes to occur | Adequacy of follow up cohorts |
| Valeur 2016 <sup>34</sup>        | <b>*A</b>                            | <b>Not Applicable</b>               | <b>B</b>                  | <b>*A</b>                                                                        | <b>A*</b>                                                          | <b>*A</b>             | <b>C</b>                                        | <b>*A</b>                     |
| De Roest 2013 <sup>53</sup>      | <b>*A</b>                            | <b>Not Applicable</b>               | <b>B</b>                  | <b>*A</b>                                                                        | <b>A*</b>                                                          | <b>*A</b>             | <b>C</b>                                        | <b>*A</b>                     |
| Huaman 2015 <sup>54</sup>        | <b>*A</b>                            | <b>Not Applicable</b>               | <b>B</b>                  | <b>*A</b>                                                                        | <b>A*</b>                                                          | <b>*A</b>             | <b>C</b>                                        | <b>*A</b>                     |
| Pérez y López 2015 <sup>56</sup> | <b>*A</b>                            | <b>Not Applicable</b>               | <b>B</b>                  | <b>*A</b>                                                                        | <b>A*</b>                                                          | <b>*A</b>             | <b>C</b>                                        | <b>*A</b>                     |
| Mazzawi 2013 <sup>55</sup>       | <b>*A</b>                            | <b>Not Applicable</b>               | <b>B</b>                  | <b>*A</b>                                                                        | <b>A*</b>                                                          | <b>*A</b>             | <b>C</b>                                        | <b>*A</b>                     |
| Staudacher 1 2011 <sup>57</sup>  | <b>*A</b>                            | <b>Not Applicable</b>               | <b>B</b>                  | <b>*A</b>                                                                        | <b>A*</b>                                                          | <b>*A</b>             | <b>C</b>                                        | <b>*A</b>                     |
